# Supplementary material
Source: PubMed Central journal article supplement (PMC4614155)
Supplement: kccy-14-08-1014151-s001.pdf [file kccy-14-08-1014151-s001.pdf]

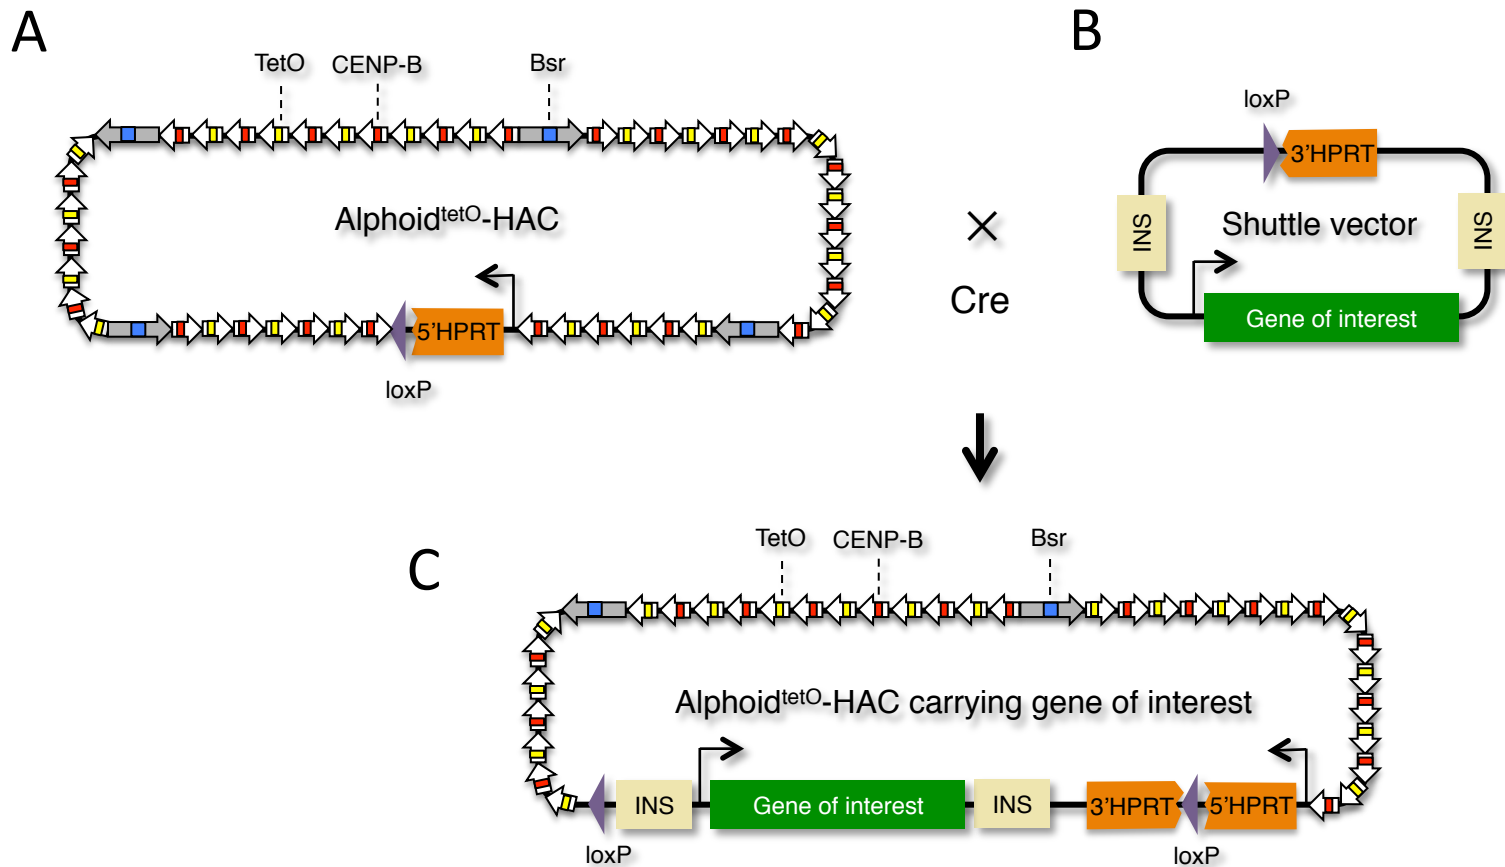

**Figure S1:** Scheme illustrating the uploading of gene of interest onto  $\text{alphoid}^{\text{tetO}}$ -HAC via Cre/loxP-mediated recombination. **(A)** “Empty” HAC consisting of multiply amplified  $\text{alphoid}$ -DNA (white block arrows) with either CENP-B box (red rectangles) or tetracycline operator sequence,  $\text{tetO}$  (yellow rectangles). The HAC also features clusters of blasticidine resistance genes (blue rectangles) within vector sequence (gray block arrows), a loxP site (purple arrowhead) and 5' portion of HPRT gene. **(B)** Basic shuttle-vector containing gene(s) of interest flanked by transcriptional insulators (INS), a loxP site, and 3' part of HPRT gene. **(C)** A result of Cre/loxP-mediated recombination; HPRT gene is restored after the successful recombination event in  $\text{HPRT}^{-/-}$  CHO cells, allowing positive clone selection in HAT-containing media. The procedure is described in more details in ref. 13.

Bright light

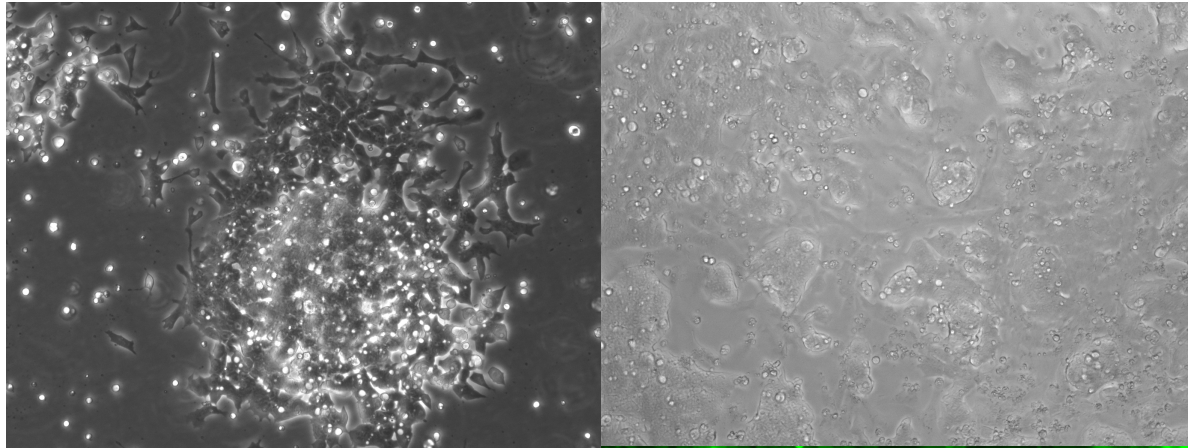

UV

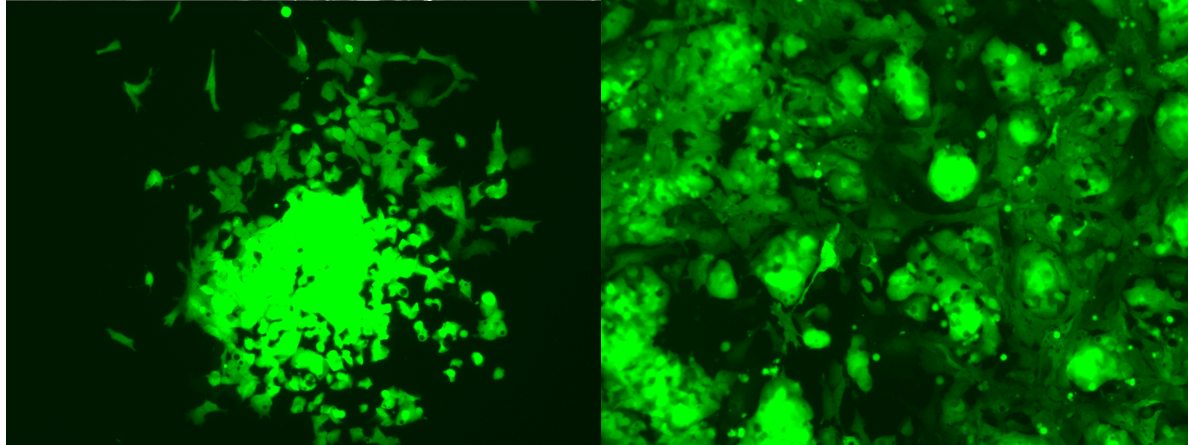

p0

p1

**Figure S2:** Primary clones of mouse ES cells, carrying HAC-GFP after MMCT procedure. Left panel – primary clone of mouse ES cells, carrying HAC-GFP during Blasticidin selection. Right panel – the same clone after first passage in culture.

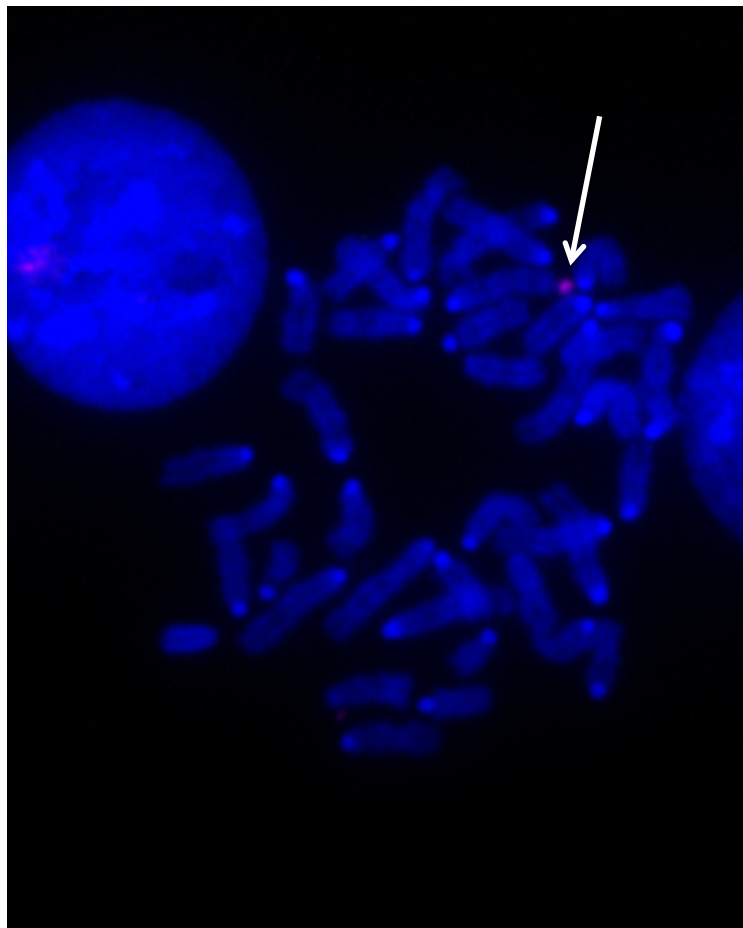

p2

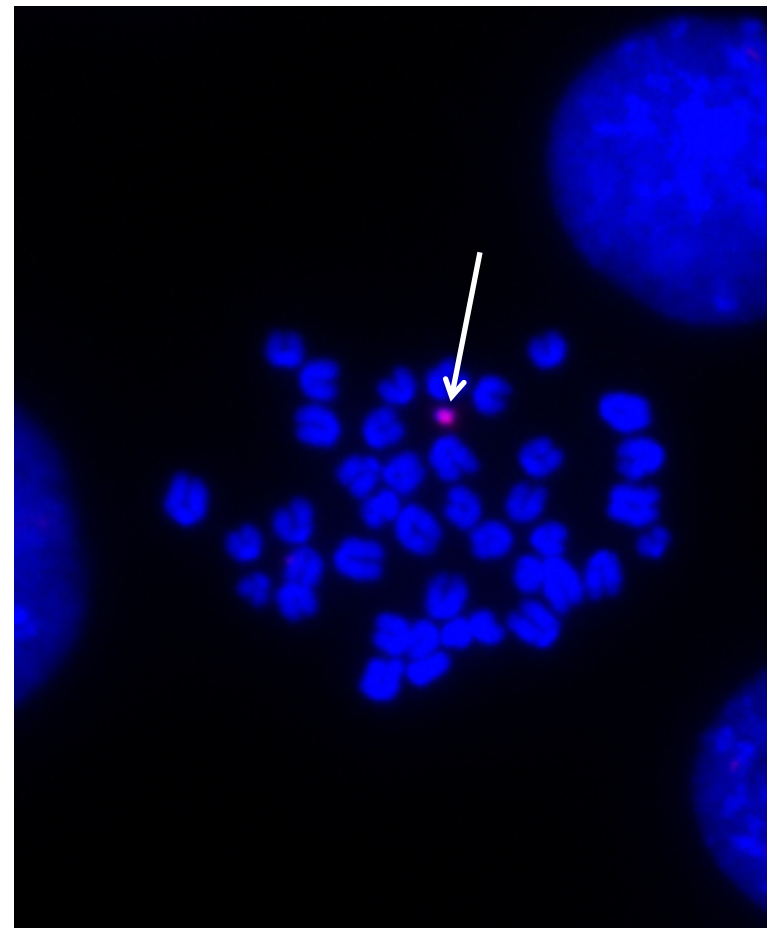

p15

**Figure S3:** Mitotical stability of HAC in mouse ES cells during culturing. Left panel – FISH analysis of metaphase spread prepared from mouse ES cells, carrying HAC-GFP at passage 2 (1<sup>st</sup> week of culturing). Right panel – FISH analysis of metaphase spread prepared from mouse ES cells, carrying HAC-GFP at passage 10 (4<sup>th</sup> week of culturing). Red signal – probe against the alphoid-tetO array labeled with Alexa546. White arrows indicate HAC.

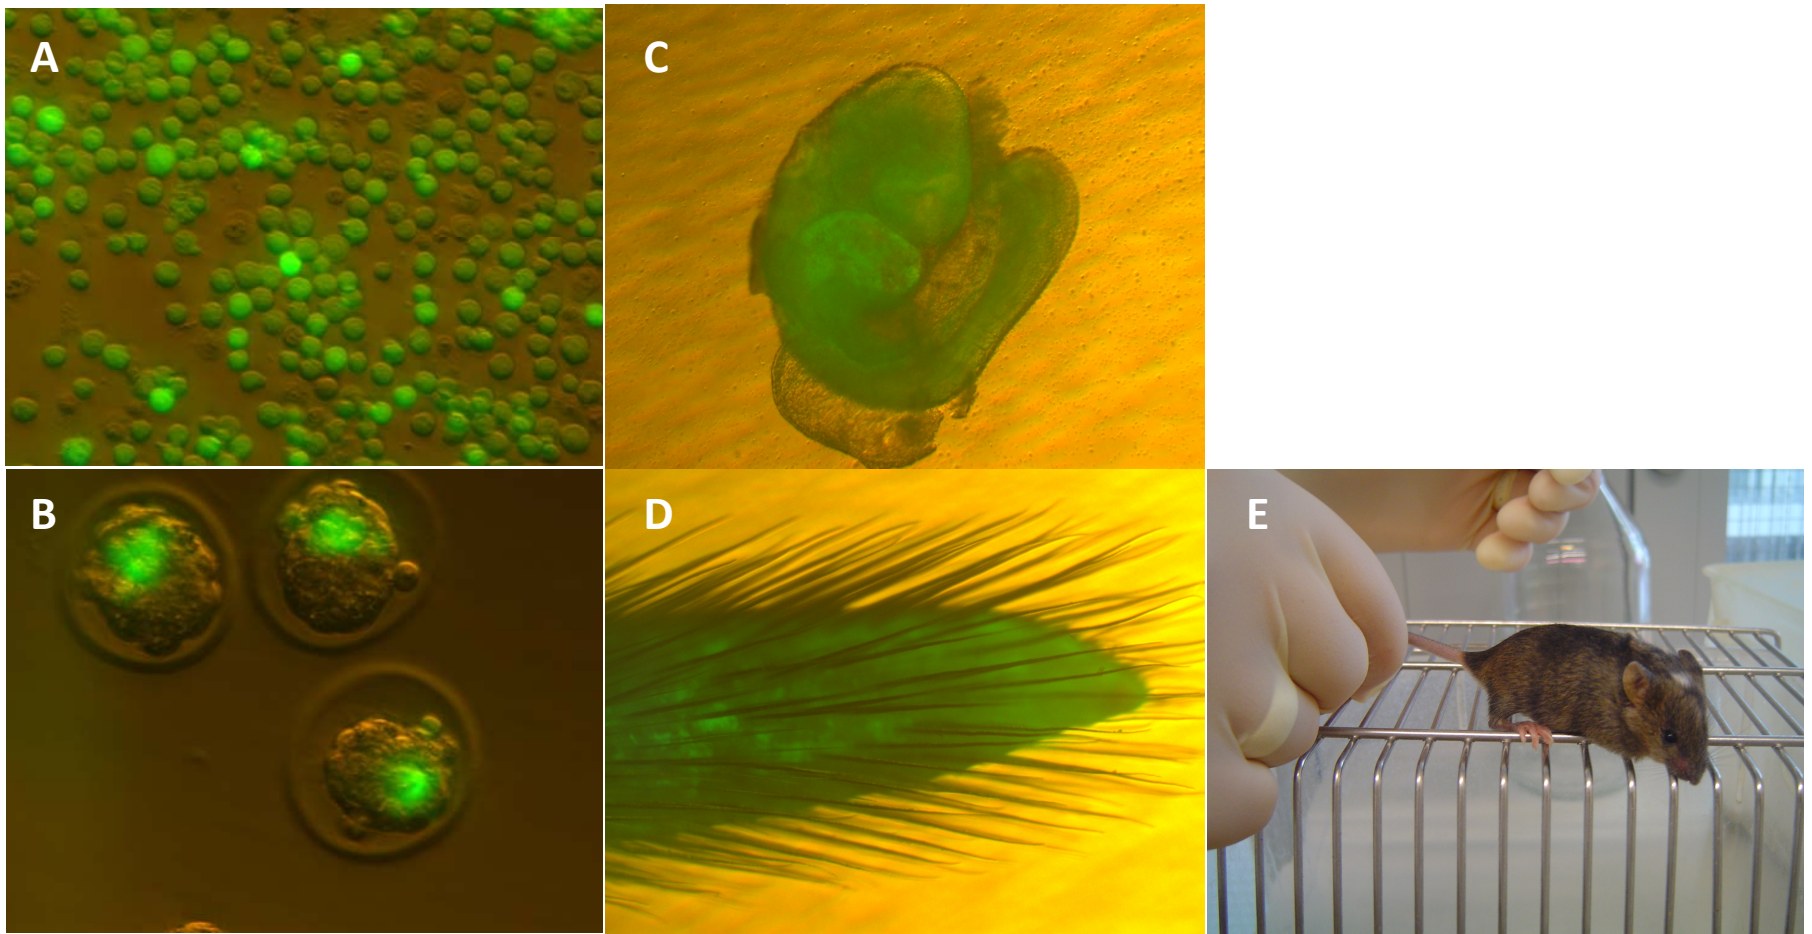

**Figure S4:** Whole cycle of chimera producing. Mouse ES cells, carrying HAC-GFP (A), preimplanted donor blastocysts immediately after injection (B), chimeric fetus (C), tail of adult chimeric mouse (D), adult chimeric mouse (E).

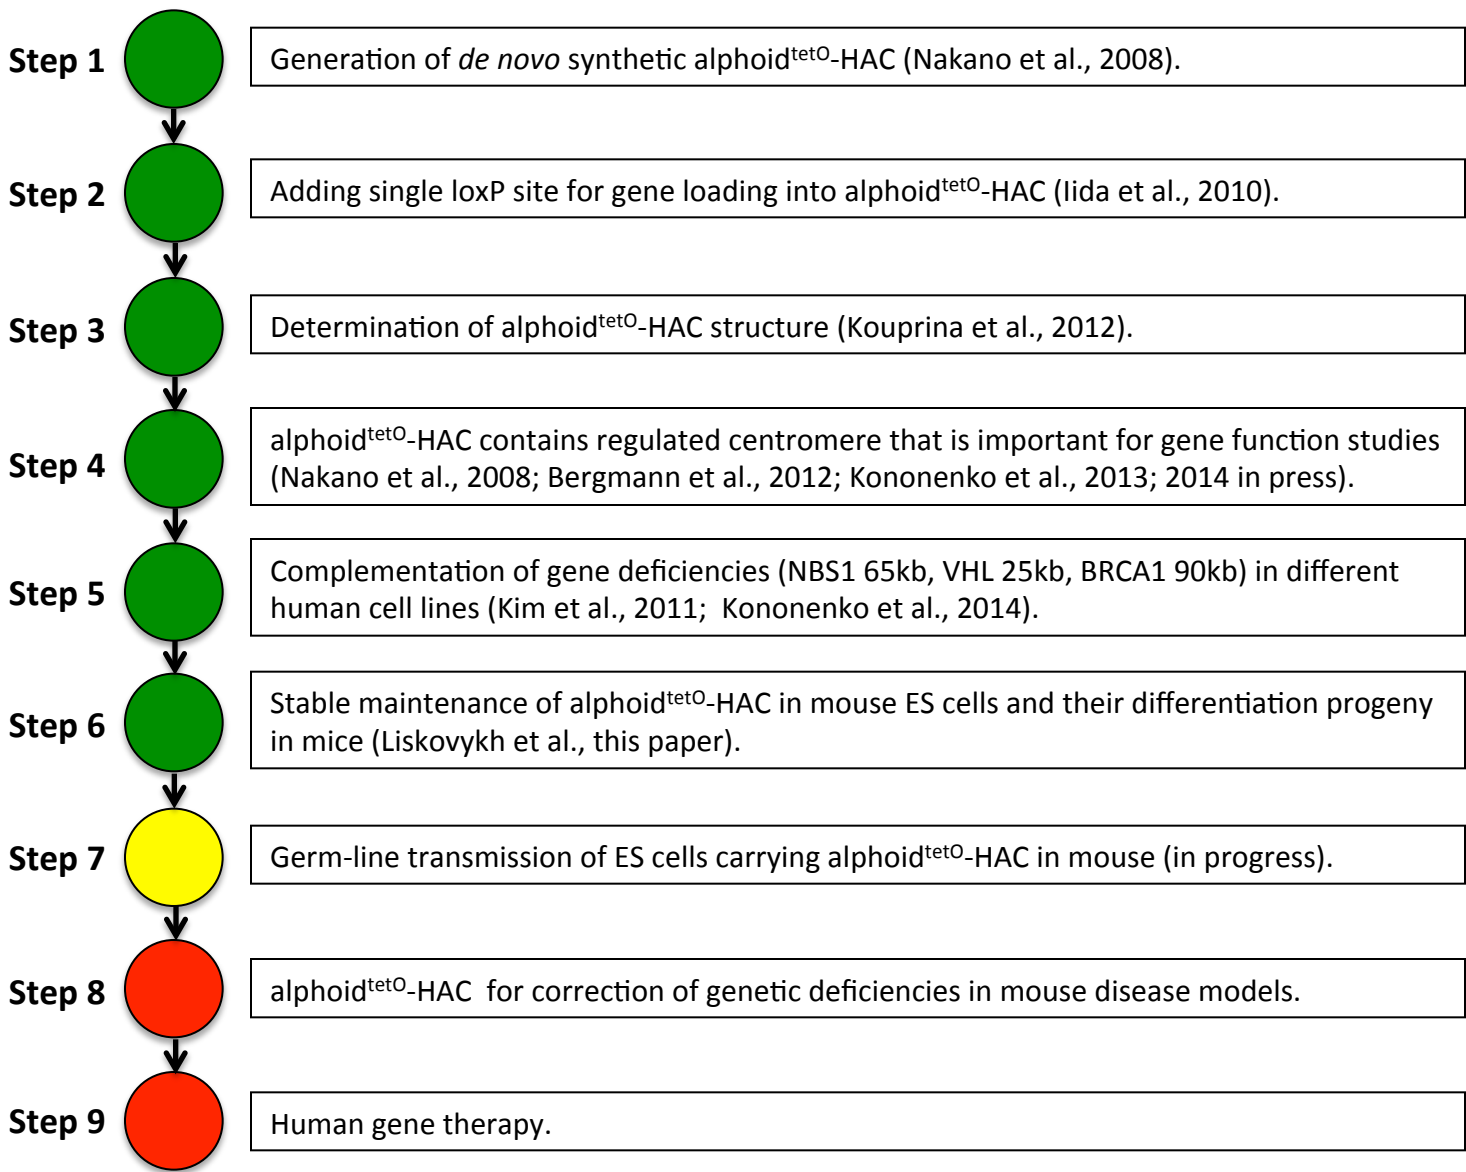

**Figure S5:** Evolution of *de novo* assembled alphoid<sup>tetO</sup>-HAC technology toward gene therapy.
